# Supplementary material for: Improvement of the Seminal Characteristics in Rams Using Agri-Food By-Products Rich in Phytomelatonin
Source: MDPI journal article supplement (doi:10.3390/ani13050905), 2023-03-02
Supplement: s1 [file s1]

**Table S2:** *In vitro* ruminal and abomasal substrate digestibility (g/kg) of the selected by-products.

|                    | Ruminal digestibility | Abomasal digestibility |
|--------------------|-----------------------|------------------------|
| Pomegranate pomace | 640a                  | 242a                   |
| Pomegranate peels  | 621a                  | 93b                    |
| Tomato pomace      | 142b                  | 43c                    |
| Grape pulp         | 344c                  | 115b                   |
| Sunflower meal     | 513d                  | 197d                   |
| SEM                | 9.3                   | 7.6                    |
| <i>P</i> - value   | <0.001                | <0.001                 |

SEM, standard error of means

Within each column, letters indicate significant differences ( $P < 0.05$ ).
