# Supplementary material for: Improvement of the Seminal Characteristics in Rams Using Agri-Food By-Products Rich in Phytomelatonin
Source: MDPI journal article supplement (doi:10.3390/ani13050905), 2023-03-02
Supplement: s1 [file s1]

Table 3.S. Chemical composition (g/kg dry matter): crude protein (CP), ether extract (EE), neutral detergent fibre (NDF) and acid detergent fibre (ADF) of the control and phytomelatonin-rich diets (n=2).

| Diet                | CP           | EE          | NDF          | ADF          |
|---------------------|--------------|-------------|--------------|--------------|
| control             | 13.97 ± 0.04 | 4.07 ± 0.09 | 27.63 ± 0.23 | 18.26 ± 0.17 |
| Phytomelatonin-rich | 13.39 ± 0.07 | 3.50 ± 0.02 | 22.09 ± 0.01 | 12.31 ± 0.09 |
