# Supplementary material for: Improvement of the Seminal Characteristics in Rams Using Agri-Food By-Products Rich in Phytomelatonin
Source: MDPI journal article supplement (doi:10.3390/ani13050905), 2023-03-02
Supplement: s1 [file s1]

**Table S1.** Chemical composition (g/kg dry matter) of the selected by-products

|                    | OM  | CP  | EE | NDF | ADF | ADL |
|--------------------|-----|-----|----|-----|-----|-----|
| Pomegranate pomace | 963 | 104 | 19 | 241 | 178 | 78  |
| Pomegranate peels  | 956 | 44  | 4  | 243 | 207 | 53  |
| Tomato pomace      | 936 | 155 | 54 | 716 | 682 | 593 |
| Grape pulp         | 894 | 126 | 49 | 293 | 335 | 201 |
| Sunflower meal     | 942 | 295 | 9  | 454 | 351 | 159 |

OM, organic matter; CP, crude protein; EE, ether extract; NDF, neutral detergent fibre; DF, acid detergent fibre; ADL, acid detergent lignin.
