# Supplementary material for: Improvement of the Seminal Characteristics in Rams Using Agri-Food By-Products Rich in Phytomelatonin
Source: MDPI journal article supplement (doi:10.3390/ani13050905), 2023-03-02

**Figure S1:** Rumen *in vitro* fermentation pattern (mL gas/g OM) of selected by-products:

■, pomegranate pomace; □, pomegranate peels; ▲, tomato pomace; ◆, grape pulp and ●, sunflower meal.

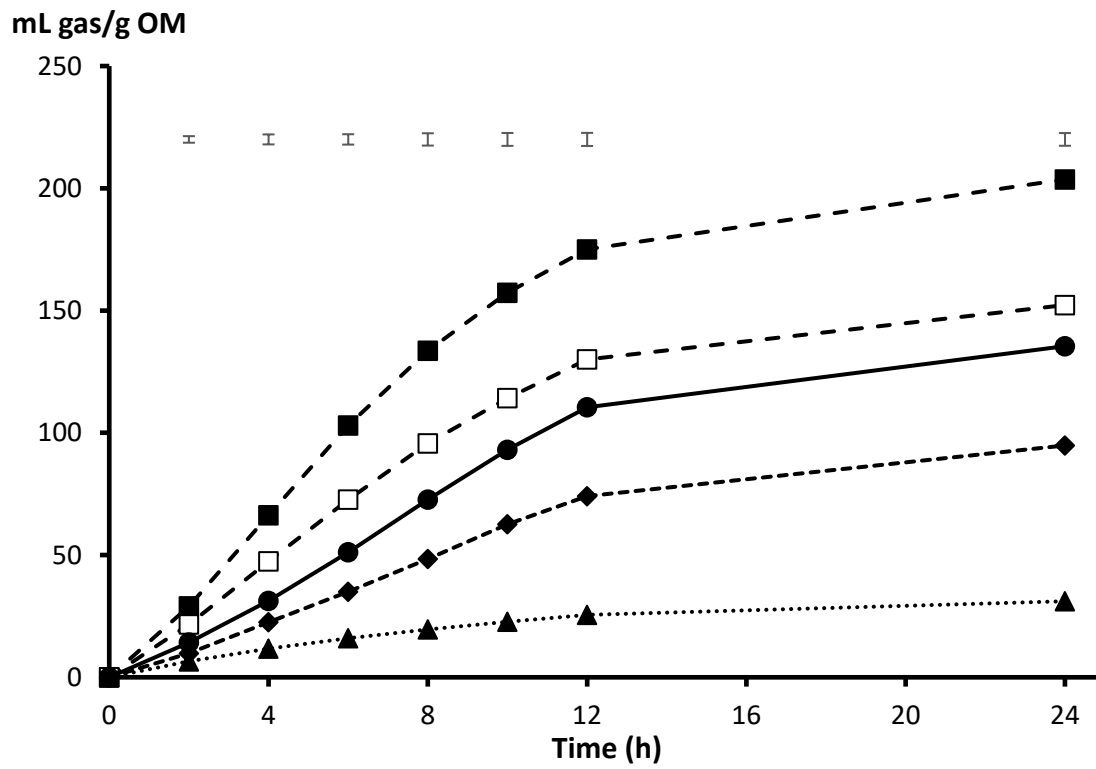

Supplement: s1 [file s1]
